# Supplementary material for: An interpretable machine learning model for diagnosis of Alzheimer's disease
Source: PubMed Central journal article supplement (PMC6398390; doi:10.7717/peerj.6543), 2019-03-01
Supplement: peerj-07-6543-s003.pdf [file peerj-07-6543-s003.pdf]

Table S2: Predicted diagnosis against the actual diagnosis using Plasma (RR=0.26) and CSF (RR=0.0) for individual patient (RID). RID represents the unique ID associated with each patient as defined in ADNI data set.

| RID  | Diagnosis |           |     |
|------|-----------|-----------|-----|
|      | Actual    | Predicted |     |
|      |           | Plasma    | CSF |
| 22   | NC        | Rejected  | NC  |
| 91   | AD        | Rejected  | AD  |
| 95   | NC        | Rejected  | AD  |
| 120  | NC        | Rejected  | NC  |
| 147  | AD        | Rejected  | AD  |
| 177  | NC        | Rejected  | NC  |
| 366  | AD        | Rejected  | AD  |
| 426  | AD        | Rejected  | NC  |
| 648  | NC        | Rejected  | NC  |
| 931  | NC        | Rejected  | NC  |
| 1161 | AD        | Rejected  | AD  |
| 1262 | AD        | Rejected  | AD  |
