# Supplementary material for: An interpretable machine learning model for diagnosis of Alzheimer's disease
Source: PeerJ journal article supplement (doi:10.7717/peerj.6543), 2019-03-01
Supplement: Supplemental_Article_S1.pdf [file Supplemental_Article_S1.pdf]

# Supplemental Article S1

1           **Title:** An interpretable machine learning model for diagnosis of Alzheimer's disease

2   Diptesh Das<sup>1</sup>, Junichi Ito <sup>2</sup>, Tadashi Kadowaki <sup>2</sup>, Koji Tsuda<sup>1,†</sup>

3   <sup>1</sup>Department of Computational Biology and Medical Sciences, Graduate School of Frontier Sciences, The  
4   University of Tokyo, Chiba 277-8561, Japan

5   <sup>2</sup>Data Science Laboratory, hhc Data Creation Center, Eisai Co. Ltd., 5-1-3 Tokodai, Tsukuba 300-2635,  
6   Japan

7   <sup>†</sup>tsuda@k.u-tokyo.ac.jp

## 8 SUPPLEMENTAL RESULTS

9 To compare the classification performance of SHIMR with that of CORELS (Angelino et al. (2017)),  
10 we ran CORELS on the same data set of 14 plasma proteins used to generate the classification results  
11 by SHIMR (Table S5). We used 13,926 mined antecedents (binary features and conjunctions of binary  
12 features with minimum support 1 which is equivalent to normalized support of 0.01). The same minimum  
13 support = 1 (normalized support = 0.01) is used in case of SHIMR. First we ran CORELS with the  
14 default parameters which try to find optimal rule list by prioritizing several bounds and setting the  
15 symmetry-aware map flag to one (-p 1). The results are shown in Table S3. The mean and standard  
16 deviation (SD) results of each performance metric (SN: Sensitivity, SP: Specificity and ACC: Accuracy)  
17 for five-fold cross validation are reported after running CORELS for ten iterations. This default setting  
18 causes a heavy pruning of the search space to ensure high efficiency of the algorithm. Hence, with  
19 this default setting CORELS always ensures to generate minimum sized rule list even after tuning the  
20 regularization parameter to a small value (-r 0.005). Here one can observe that as we reduced the amount  
21 of regularization ( $r=0.03 \rightarrow r=0.005$ ), the accuracy dropped ( $acc=0.64 \rightarrow acc=0.61$ ) due to the effect of  
22 model overfitting.

23 In another setting, we ran CORELS to prioritize by the objective (-c 3) and at the same time we  
24 excluded the minimum support bounds (-a 1), but used the permutation map bound (-p 1). This allows  
25 CORELS to refrain from aggressive pruning based on several bounds. The results of this customized  
26 parameters setting are shown in Table S4. The mean and standard deviation (SD) results of each  
27 performance metric (SN: Sensitivity, SP: Specificity and ACC: Accuracy) for five-fold cross validation  
28 are reported after running CORELS for ten iterations. From Table S4, one can see that with this custom  
29 setting, CORELS captures more number of rules with increased classification accuracy. The best result is  
30 found for regularization parameter  $\lambda=0.02$ . However, even with this custom setting, the CORELS  
31 could not capture more than 7 rules on average due to the upper bound of prefix length which is controlled  
32 by the current best objective and the value of regularization parameter  $\lambda$  (for details please refer to  
33 the "Section 3.5 Upper bound on prefix length" of CORELS paper, Angelino et al. (2017)). As the  $\lambda$   
34 value is decreased, the classification accuracy drops owing to model overfitting. Now, comparing with the  
35 classification performance of SHIMR (Table S5), it can be observed that accuracy of SHIMR ( $acc=0.79$ )  
36 is much higher than the best achieved accuracy ( $acc=0.69$ ,  $\lambda=0.02$ ) obtained by CORELS.

## 37 SUPPLEMENTAL METHODS

The loss function of SHIMR can be written as

$$\begin{aligned}\phi(z) &= \max\{0, (1-z)\} + \frac{1-2d}{d} \max\{0, -z\} \\ &= (1-z)_+ + \frac{1-2d}{d} (-z)_+\end{aligned}\tag{1}$$

In terms of slack variables, the **learning objective** can be written as

$$\begin{aligned}\underset{\xi_i, \gamma_i}{\text{Minimize}} \quad & \phi(z) = \xi_i + \frac{1-2d}{d} \gamma_i, \\ \text{Subject to} \quad & \xi_i \geq (1-z_i) \quad \text{and} \quad \gamma_i \geq -z_i, \\ \text{and} \quad & 0.5 \geq d \geq 0\end{aligned}\tag{2}$$

38 Now handling the problem of class imbalance by choosing different regularization parameters separately  
39 for positive ( $C^+$ ) and negative ( $C^-$ ) classes, the primal objective of the above learning problem can be  
40 written as

**Primal Objective:**

$$\min_{a,b,\xi,\gamma} \sum_{j=1}^m (a_j^+ + a_j^-) + C^+ \sum_{\{i|y_i=+1\}} \left( \xi_i + \frac{1-2d}{d} \gamma_i \right) + C^- \sum_{\{i|y_i=-1\}} \left( \xi_i + \frac{1-2d}{d} \gamma_i \right)$$

Such that

$$\begin{aligned} y_i \left( \sum_{j=1}^m (a_j^+ - a_j^-) H_{ij} + b \right) + \xi_i &\geq 1, \quad \forall i = 1, \dots, n \\ y_i \left( \sum_{j=1}^m (a_j^+ - a_j^-) H_{ij} + b \right) + \gamma_i &\geq 0, \quad \forall i = 1, \dots, n \\ \xi_i &\geq 0, \quad \gamma_i \geq 0, \quad \forall i = 1, \dots, n \\ a_j^+ &\geq 0, \quad a_j^- \geq 0, \quad \forall j = 1, \dots, m \end{aligned} \quad (3)$$

41  $H_{ij} = h_j(x_i)$  is the hypothesis of the  $i^{\text{th}}$  sample, generated based on only the  $j^{\text{th}}$  complex feature  
42 vector. Therefore, considering all the samples and all the feature vectors, the hypothesis matrix  $H$  can  
43 be represented as a  $n$  by  $m$  matrix, where each column  $H_{\cdot j}$  is the output of the  $j^{\text{th}}$  hypothesis on the  
44 training data. A typical hypothesis function can be defined as  $H_{ij} = 2I(j \subseteq x_i) - 1$ , where,  $I(\cdot)$  refers  
45 to the indicator function.  $I(\cdot) = 1$ , if the condition inside holds true and 0 otherwise. Therefore, each  
46 hypothesis can assume either  $-1$  or  $+1$ . Directly solving the primal objective is difficult due to large  
47 number of parameters. However, the dual objective can be solved efficiently using column generation  
48 based simplex method.

49

**Dual Objective:**

$$\begin{aligned} W = \max_{P,Q} \sum_{i=1}^n P_i \\ \text{s.t. } \left| \sum_{i=1}^n (P_i + Q_i) y_i H_{ij} \right| &\leq 1, \quad \forall j = 1, \dots, m \\ 0 \leq P_i &\leq C^+, \quad \forall i = 1, \dots, n | y_i = +1 \\ 0 \leq P_i &\leq C^-, \quad \forall i = 1, \dots, n | y_i = -1 \\ 0 \leq Q_i &\leq \frac{1-2d}{d} C^+, \quad \forall i = 1, \dots, n | y_i = +1 \\ 0 \leq Q_i &\leq \frac{1-2d}{d} C^-, \quad \forall i = 1, \dots, n | y_i = -1 \\ \sum_{i=1}^n (P_i + Q_i) y_i &= 0 \end{aligned} \quad (4)$$

The column generation based simplex method is an iterative procedure to find a subset  $\hat{H}$  of the columns of  $H$  by using a base learning algorithm and then solve the restricted master problem until the optimum solution is reached. In each iteration the goal is to find the most violated constraint  $|\sum_{i=1}^n (P_i + Q_i) y_i H_{ij}| \leq 1$  based on the current values of  $P$  and  $Q$  and add it to the hypothesis set to solve the restricted master problem. In our case, finding the most violated constraint corresponds to searching for a complex feature that maximizes the classification gain ( $g(j) = |\sum_{i=1}^n (P_i + Q_i) y_i H_{ij}|$ ) as given in equation (5). To find the most violated complex feature (or hypothesis) in every iteration we used weighted LCM (Linear time Closed itemset Miner). Since our algorithm is a sparse convex linear optimization problem, global optimum solution is achieved. Our algorithm is summarized in Algorithm 1.

$$j^* \leftarrow \max_{j \in m} \left| \sum_{i=1}^n (P_i + Q_i) y_i H_{ij} \right| \quad (5)$$

---

**Algorithm 1: SHIMR**

---

- 1: Let,  $u_i = P_i + Q_i$ . Initialize  $u \leftarrow (\frac{1}{n}, \dots, \frac{1}{n})$
  - 2:  $d = 0.5$
  - 3: **loop:**
  - 4:  $\{j\} \leftarrow \text{LCM}(u, s, X)$
  - 5: Find weak hypothesis (or feature set) using equation (5).
  - 6: if  $(|\sum_{i=1}^n (P_i + Q_i)y_i H_{ij}| \leq 1)$  then
  - 7: break ▷ No more hypothesis
  - 8: end if
  - 9:  $H \leftarrow H \cup \{j^*\}$  ▷ Update hypothesis
  - 10:  $(a, b, P, Q) \leftarrow \text{solve (4) for a fixed value of 'd'}$ .
  - 11:  $s \leftarrow \max(g^+(j), g^-(j))$
  - 12: **end loop**
  - 13: Decrease  $d(0.5 \geq d \geq 0)$  and repeat step (3).
  - 14: Choose the best ' $d^*$ ' corresponding to the maximum gain,  
 $d^* \leftarrow \underset{d}{\operatorname{argmax}} g(\{j\}) = \underset{d}{\operatorname{argmax}} |\sum_{j=1}^m \sum_{i=1}^n (P_i + Q_i)y_i H_{ij}|$ .
  - 15: **return**  $(a^*, d^*)$ .
  - 16: end
- 

**Derivation of Dual:**

The Lagrangian of the primal objective function can be written as

$$\begin{aligned} \min_{a, b, \xi, \gamma} L &= \sum_{j=1}^m (a_j^+ + a_j^-) + C^+ \sum_{\{i|y_i=+1\}}^n \left( \xi_i + \frac{1-2d}{d} \gamma_i \right) + C^- \sum_{\{i|y_i=-1\}}^n \left( \xi_i + \frac{1-2d}{d} \gamma_i \right) \\ &+ \sum_{i=1}^n P_i \left[ 1 - \xi_i - y_i \left( \sum_{j=1}^m (a_j^+ - a_j^-) H_{ij} + b \right) \right] + \sum_{i=1}^n Q_i \left[ -\gamma_i - y_i \left( \sum_{j=1}^m (a_j^+ - a_j^-) H_{ij} + b \right) \right] \\ &- \sum_{i=1}^n R_i \xi_i - \sum_{i=1}^n S_i \gamma_i - \sum_{j=1}^m T_j^+ a_j^+ - \sum_{j=1}^m T_j^- a_j^- \\ &= \sum_{i=1}^n P_i + \sum_{j=1}^m a_j^+ \left[ 1 - \sum_{i=1}^n (P_i + Q_i) y_i H_{ij} - T_j^+ \right] + \sum_{j=1}^m a_j^- \left[ 1 + \sum_{i=1}^n (P_i + Q_i) y_i H_{ij} - T_j^- \right] \\ &- b \sum_{i=1}^n (P_i + Q_i) y_i + \sum_{\{i|y_i=+1\}}^n \xi_i \left[ C^+ - P_i - R_i \right] + \sum_{\{i|y_i=-1\}}^n \xi_i \left[ C^- - P_i - R_i \right] \\ &+ \sum_{\{i|y_i=+1\}}^n \gamma_i \left[ \frac{1-2d}{d} C^+ - Q_i - S_i \right] + \sum_{\{i|y_i=-1\}}^n \gamma_i \left[ \frac{1-2d}{d} C^- - Q_i - S_i \right] \end{aligned}$$

To solve the above minimization problem, we take the partial derivatives of  $L$  with respect to the variables  $a, b, \xi, \gamma$ .

$$\begin{aligned} \frac{\partial L}{\partial a_j^+} = 0 &\Rightarrow 1 - \sum_{i=1}^n (P_i + Q_i) y_i H_{ij} - T_j^+ = 0 \\ \frac{\partial L}{\partial a_j^-} = 0 &\Rightarrow 1 + \sum_{i=1}^n (P_i + Q_i) y_i H_{ij} - T_j^- = 0 \\ &\Rightarrow \left| \sum_{i=1}^n (P_i + Q_i) y_i H_{ij} \right| \leq 1, \quad [T_j^+, T_j^- \geq 0], \quad \forall j = 1, \dots, m \\ \frac{\partial L}{\partial b} = 0 &\Rightarrow \sum_{i=1}^n (P_i + Q_i) y_i = 0 \end{aligned}$$

$$\begin{aligned}
\frac{\partial L}{\partial \xi_i} = 0 &\Rightarrow C^+ - P_i - R_i = 0, \quad \forall i = 1, \dots, n | y_i = +1 \\
&\text{and } C^- - P_i - R_i = 0, \quad \forall i = 1, \dots, n | y_i = -1 \\
&\Rightarrow 0 \leq P_i \leq C^+, \quad [R_i \geq 0], \quad \forall i = 1, \dots, n | y_i = +1 \\
&\text{and } 0 \leq P_i \leq C^-, \quad [R_i \geq 0], \quad \forall i = 1, \dots, n | y_i = -1 \\
\\
\frac{\partial L}{\partial \gamma_i} = 0 &\Rightarrow \frac{1-2d}{d}C^+ - Q_i - S_i = 0, \quad \forall i = 1, \dots, n | y_i = +1 \\
&\text{and } \frac{1-2d}{d}C^- - Q_i - S_i = 0, \quad \forall i = 1, \dots, n | y_i = -1 \\
&\Rightarrow 0 \leq Q_i \leq \frac{1-2d}{d}C^+, \quad [S_i \geq 0], \quad \forall i = 1, \dots, n | y_i = +1 \\
&\text{and } 0 \leq Q_i \leq \frac{1-2d}{d}C^-, \quad [S_i \geq 0], \quad \forall i = 1, \dots, n | y_i = -1
\end{aligned}$$

50 Therefore, substituting the results of above partial derivatives, the dual objective becomes:  
51

$$\begin{aligned}
W = \max_{P, Q} &\sum_{i=1}^n P_i \\
\text{s.t.} &\left| \sum_{i=1}^n (P_i + Q_i) y_i H_{ij} \right| \leq 1, \quad \forall j = 1, \dots, m \\
&0 \leq P_i \leq C^+, \quad \forall i = 1, \dots, n | y_i = +1 \\
&0 \leq P_i \leq C^-, \quad \forall i = 1, \dots, n | y_i = -1 \\
&0 \leq Q_i \leq \frac{1-2d}{d}C^+, \quad \forall i = 1, \dots, n | y_i = +1 \\
&0 \leq Q_i \leq \frac{1-2d}{d}C^-, \quad \forall i = 1, \dots, n | y_i = -1 \\
&\sum_{i=1}^n (P_i + Q_i) y_i = 0
\end{aligned}$$

## 52 REFERENCES

- 53 Angelino, E., Larus-Stone, N., Alabi, D., Seltzer, M., and Rudin, C. (2017). Learning certifiably optimal  
54 rule lists. In *Proceedings of the 23rd ACM SIGKDD International Conference on Knowledge Discovery*  
55 *and Data Mining*, pages 35–44. ACM.
