# Supplementary material for: An interpretable machine learning model for diagnosis of Alzheimer's disease
Source: PeerJ journal article supplement (doi:10.7717/peerj.6543), 2019-03-01
Supplement: Table_S1.pdf [file Table_S1.pdf]

Table S1: The list of starting set of 14 plasma proteins used in this work. This is a collection of plasma proteins responsible for AD pathology as reported in literature.

| <b>Abbreviation</b> | <b>Protein Name</b>                            |
|---------------------|------------------------------------------------|
| <b>A1Micro</b>      | <b>Alpha-1-Microglobulin</b>                   |
| <b>ApoAII</b>       | <b>Apolipoprotein A-II</b>                     |
| <b>ApoE</b>         | <b>Apolipoprotein E</b>                        |
| <b>BNP</b>          | <b>Brain Natriuretic Peptide</b>               |
| <b>SGOT</b>         | <b>Serum Glutamic Oxaloacetic Transaminase</b> |
| <b>A2Macro</b>      | <b>Alpha-2-Macroglobulin</b>                   |
| <b>BTC</b>          | <b>Betacellulin</b>                            |
| <b>CRP</b>          | <b>C-Reactive Protein</b>                      |
| <b>Eotaxin-3</b>    | <b>Eotaxin-3</b>                               |
| <b>IGM</b>          | <b>Immunoglobulin M (IGM)</b>                  |
| <b>IL16</b>         | <b>Interleukin-16</b>                          |
| <b>MPO</b>          | <b>Myeloperoxidase (MPO)</b>                   |
| <b>PLGF</b>         | <b>Placenta Growth Factor (PLGF)</b>           |
| <b>RAGE</b>         | <b>Receptor for advanced glycosylation end</b> |
