# Supplementary material for: An interpretable machine learning model for diagnosis of Alzheimer's disease
Source: PeerJ journal article supplement (doi:10.7717/peerj.6543), 2019-03-01
Supplement: Table_S3.pdf [file Table_S3.pdf]

Table S3: **Interpretability vs accuracy trade-off:** CORELS with default parameters setting (-c 2 -p 1) on plasma data.

| CORELS |             |      |      |      |      |      |      |      |
|--------|-------------|------|------|------|------|------|------|------|
| Lambda | Rule Length |      | SN   |      | SP   |      | ACC  |      |
|        | Mean        | SD   | Mean | SD   | Mean | SD   | Mean | SD   |
| 0.03   | 1.62        | 0.49 | 0.89 | 0.13 | 0.19 | 0.16 | 0.64 | 0.08 |
| 0.02   | 1.52        | 0.5  | 0.91 | 0.1  | 0.19 | 0.14 | 0.65 | 0.07 |
| 0.01   | 1.6         | 0.49 | 0.83 | 0.16 | 0.2  | 0.16 | 0.61 | 0.08 |
| 0.005  | 1.6         | 0.49 | 0.84 | 0.15 | 0.2  | 0.16 | 0.61 | 0.08 |
