# Supplementary material for: An interpretable machine learning model for diagnosis of Alzheimer's disease
Source: PeerJ journal article supplement (doi:10.7717/peerj.6543), 2019-03-01
Supplement: Table_S4.pdf [file Table_S4.pdf]

Table S4: **Interpretability vs accuracy trade-off:** CORELS with custom parameters setting (-c 3 -p 1 -a 1) on plasma data.

| CORELS |             |      |      |      |      |      |      |      |
|--------|-------------|------|------|------|------|------|------|------|
| Lambda | Rule Length |      | SN   |      | SP   |      | ACC  |      |
|        | Mean        | SD   | Mean | SD   | Mean | SD   | Mean | SD   |
| 0.02   | 5.68        | 0.71 | 0.82 | 0.11 | 0.44 | 0.2  | 0.69 | 0.08 |
| 0.01   | 6.86        | 0.75 | 0.8  | 0.13 | 0.42 | 0.2  | 0.66 | 0.09 |
| 0.005  | 6.94        | 0.76 | 0.79 | 0.12 | 0.42 | 0.2  | 0.66 | 0.09 |
| 0.001  | 6.96        | 0.75 | 0.81 | 0.13 | 0.41 | 0.20 | 0.66 | 0.09 |
